# Supplementary material
Source: Springer Nature journal article supplement (https://www.springermedizin.de/resource/supplementary/12931_2012_1288_MOESM5_ESM.pdf/9425722)

**A**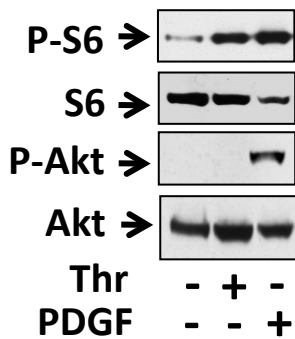**B**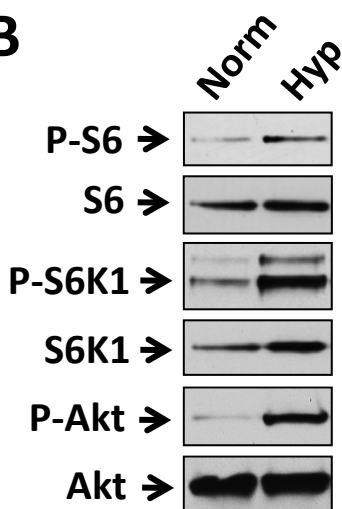**C**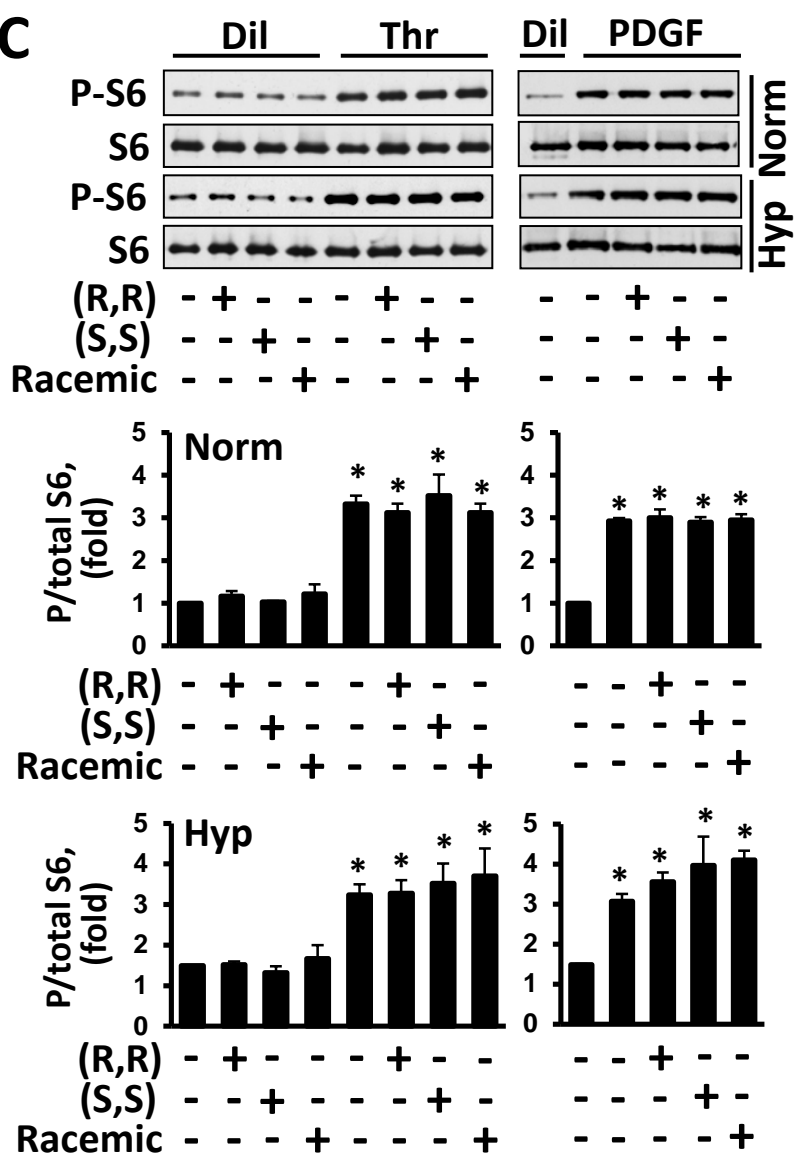**D**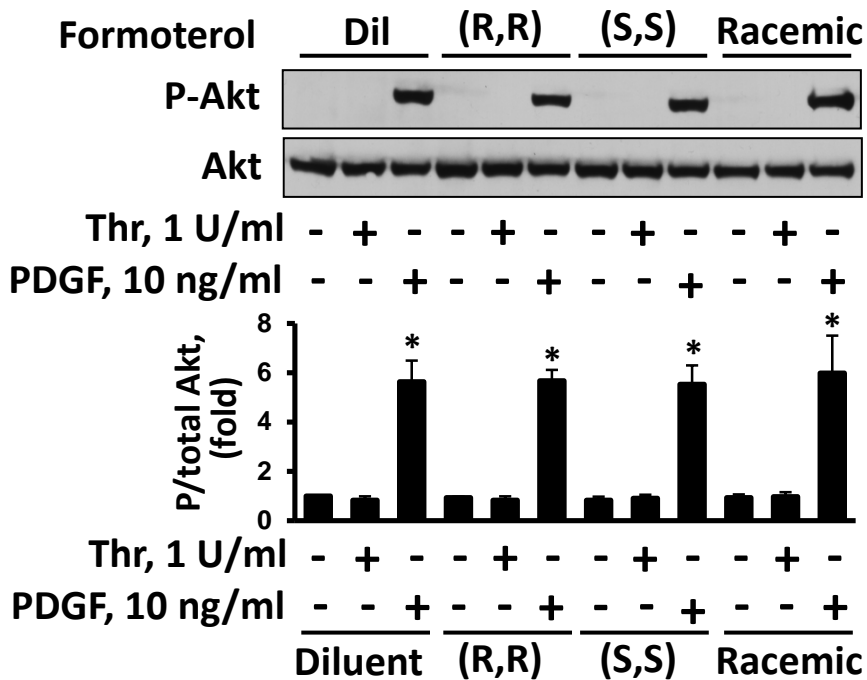

Supplement: MOESM5 [file 9425722]
